# Supplementary material for: Identification of bladder cancer prognostic biomarkers using an ageing gene-related competitive endogenous RNA network
Source: PubMed Central journal article supplement (PMC5762356; doi:10.18632/oncotarget.22905), 2017-12-04
Supplement: oncotarget-08-111742-s001.pdf [file oncotarget-08-111742-s001.pdf]

# Identification of bladder cancer prognostic biomarkers using an ageing gene-related competitive endogenous RNA network

## SUPPLEMENTARY MATERIALS

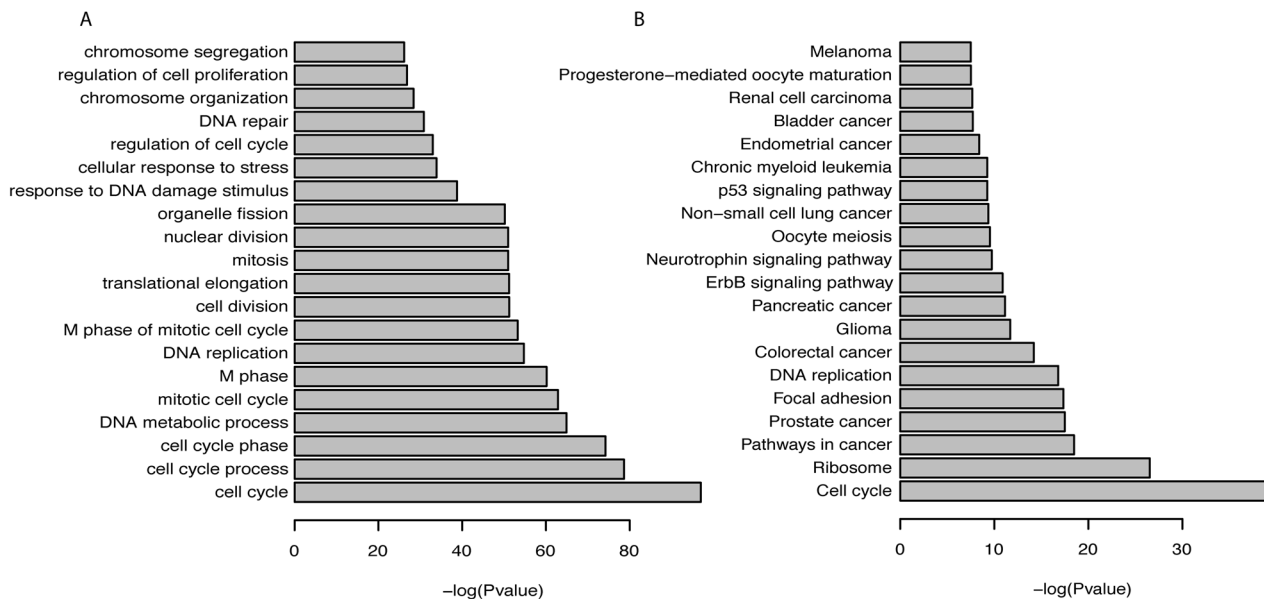

**Supplementary Figure 1: GO and KEGG enrichment analyses of AgeingCeNet genes.** (A) GO enrichment analysis of AgeingCeNet genes. The x-axis shows the value of negative log transformed of p value. The y-axis shows the top 20 enriched GO biological terms. (B) KEGG enrichment analysis of AgeingCeNet genes. The x-axis shows the value of negative log transformed of p value. The y-axis shows the top 20 enriched KEGG pathways.

### Supplementary Table 1: Interactions in AgeingCeNet

See Supplementary File 1

### Supplementary Table 2: Ageing genes and their ceRNAs validation results

See Supplementary File 2

### Supplementary Table 3: Enriched KEGG pathways of mRNAs in AgeingCeNet

See Supplementary File 3

**Supplementary Table 4: Cox regression coefficient table for each gene of modules identified by Cfinder**

**See Supplementary File 4**

**Supplementary Table 5: The log rank p-values and mean risk scores summary table for modules identified by CFinder**

**See Supplementary File 5**

**Supplementary Table 6: K11M14 and K13M4 ceRNA pairs and related miRNA list**

**See Supplementary File 6**

**Supplementary Table 7: Ageing mRNA and ageing lncRNA list**

**See Supplementary File 7**
